# Supplementary material
Source: publisher figshare collection journal article supplement (https://frontiersin.figshare.com/ndownloader/files/31144687)
Supplement: Supplementary file [file 31144687]

## Supporting information

# Co-Ni basic carbonate nanowire/carbon nanotube network with high electrochemical capacitive performance via electrochemical conversion

Furui Tan<sup>\*,1</sup>, Hongyuan Chen<sup>1</sup>, Ronghua Yuan<sup>1</sup>, Xuming Zhang<sup>2</sup>, Deliang Chen<sup>\*,1</sup>

<sup>1</sup> School of Materials Science and Engineering, Dongguan University of Technology, Dongguan, P. R. China

<sup>2</sup> Department of Applied Physics, The Hong Kong Polytechnic University, Hongkong, P.R. China.

\* Corresponding. author: tanfr@dgut.edu.cn; dlchen@dgut.edu.cn (DL Chen)

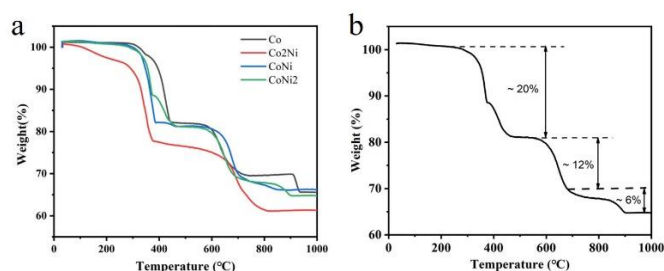

Figure S1. Thermogravimetric Analysis of (a) Co, Co<sub>2</sub>Ni, CoNi and CoNi<sub>2</sub>; (b) the thermal evolution stage of CoNi<sub>2</sub> carbonate.

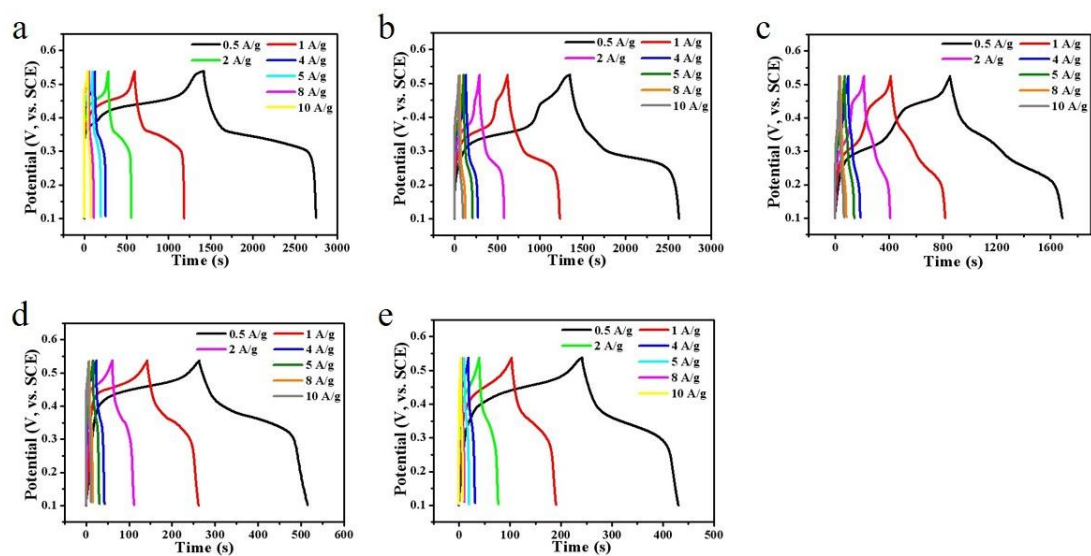

Figure S2. Galvanostatic charge-discharge curve of Ni (a); Ni<sub>2</sub>Co(b); (c)NiCo; (d) NiCo<sub>2</sub>; (e) Co.
